# Supplementary material
Source: publisher figshare collection journal article supplement (https://gsapubs.figshare.com/ndownloader/files/22745669)
Supplement: Supplementary file 1 [file 22745669]

DR2004057

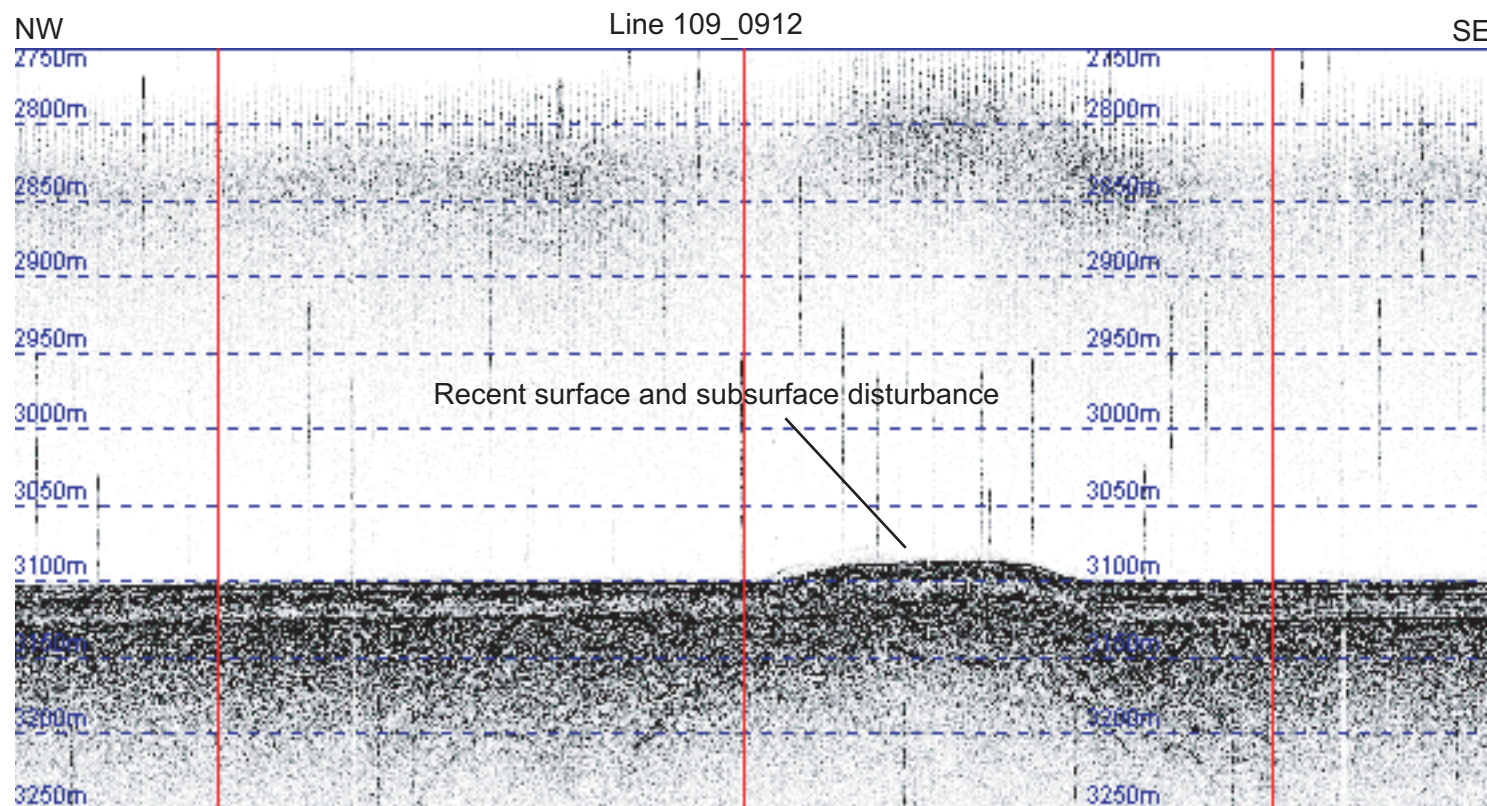

Figure DR1. 3.5 KHz echo-sounder sub-bottom profile collected across the north-east extension of the prominent feature classified by Wilson (1986) as a pseudofault (see Figs. 1A and 2C). Profile was collected during transit over the area by the R/V Roger Revelle in July 2002.
